# Supplementary material for: Tree canopy halves urban heat island effect globally but disproportionately benefits higher incomes and suburbs
Source: Research Square preprint supplement (doi:10.21203/rs.3.rs-6982703/v1), 2025-07-04
Supplement: Supplementary file 1 [file 74d245abd31fd9d65c270262.pdf]

July 2<sup>nd</sup>, 2025

All data and code are available in our Data Dryad repository: 10.5061/dryad.905qfttz0. This link is currently not publicly available, during manuscript review, and there is a ZIP file with the same data that reviewers can review, if they need access to the full data and code.

Link to Zip file: [https://www.sugarsync.com/pf/D6404393\\_00582960\\_171099](https://www.sugarsync.com/pf/D6404393_00582960_171099)

Alternatively and equivalently, reviewers can access the Data Dryad archive through this private link:

<http://datadryad.org/share/tT23QwCbydU6ElmSNXua4vnIh55Rlax6RLq9vbTDeSg>.
