# Supplementary material for: Tree canopy halves urban heat island effect globally but disproportionately benefits higher incomes and suburbs
Source: Research Square preprint supplement (doi:10.21203/rs.3.rs-6982703/v1), 2025-07-04
Supplement: Supplementary file 2 [file 79a49c3cd06d40f8352dc1cc.pdf]

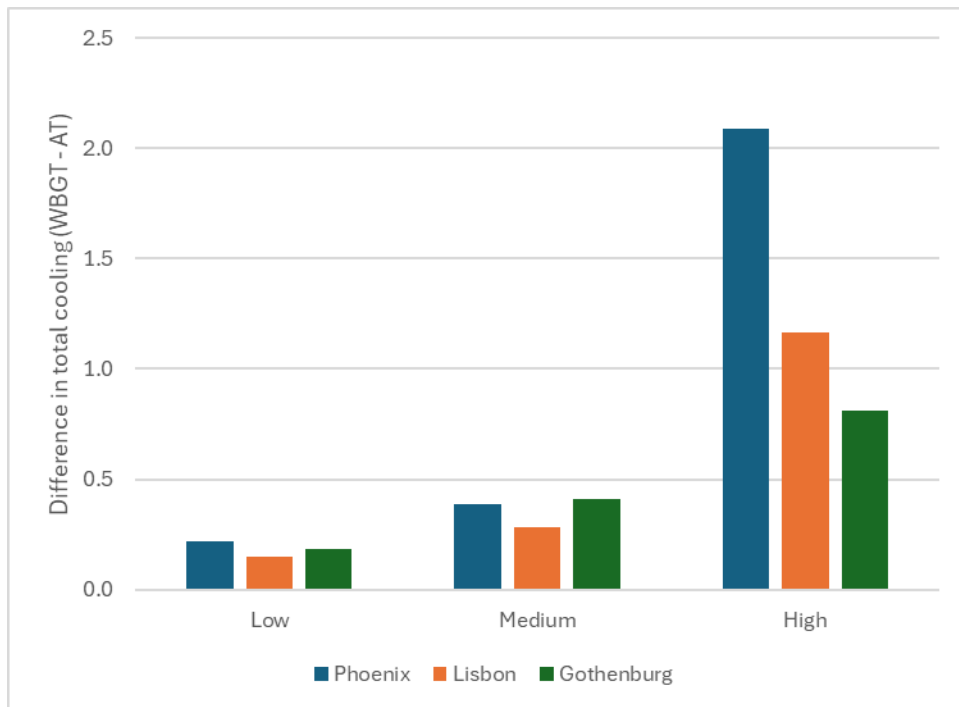

Figure S1. The reduction in total temperature reduction by trees depends on the metric. The total cooling measured in wet bulb globe temperature (WBGT) is consistently greater than the cooling measured in summer air temperatures (AT), but the difference between them depends on FUA and tree cover. Cool Air was run for three sample landscapes in each FUA of low, medium, and high tree cover, see text for details.

Table S1. CMIP6 models used to assess mid-century changes in afternoon temperatures, variables assessed (daily maximum temperature, or ‘tasmax’), and the Equilibrium Climate Sensitivity (ECS) of each CMIP6 model.

| <b>Model Name</b> | <b>Variable</b> | <b>ECS</b> |
|-------------------|-----------------|------------|
| ACCESS-ESM1-5     | tasmax          | 3.88       |
| BCC-CSM2-MR       | tasmax          | 3.02       |
| CMCC-CM2-SR5      | tasmax          | 3.56       |
| CMCC-ESM2         | tasmax          | 3.58       |
| FGOALS-g3         | tasmax          | 2.87       |
| GFDL-CM4          | tasmax          | 3.89       |
| GFDL-ESM4         | tasmax          | 2.65       |
| GISS-E2-1-G       | tasmax          | 2.64       |
| KIOST-ESM         | tasmax          | 3.36       |
| MIROC-ES2L        | tasmax          | 2.66       |
| MIROC6            | tasmax          | 2.60       |
| 0MPI-ESM1-2-HR    | tasmax          | 2.98       |
| MPI-ESM1-2-LR     | tasmax          | 3.02       |
| MRI-ESM2-0        | tasmax          | 3.13       |
| NorESM2-LM        | tasmax          | 2.56       |
